# Supplementary material
Source: PubMed Central journal article supplement (PMC4496005)
Supplement: NIHMS701620-supplement-1.pdf [file NIHMS701620-supplement-1.pdf]

# Supporting Information

## Concerted Motions Networking Pores and Distant Ferroxidase Centers

### Enable Bacterioferritin Function and Iron Traffic

*Huili Yao,<sup>†</sup> Huan Rui,<sup>§</sup> Ritesh Kumar,<sup>§</sup> Kate Eshelman,<sup>†</sup> Scott Lovell,<sup>‡</sup> Kevin P. Battaile,<sup>¶</sup> Wonpil Im,<sup>§</sup>  
and Mario Rivera<sup>†\*</sup>*

<sup>†</sup>Department of Chemistry, University of Kansas, Multidisciplinary Research Building, 2030 Becker Dr., Lawrence, KS 66047.

<sup>‡</sup>Del Shankel Structural Biology Center, University of Kansas, 2034 Becker Dr., Lawrence, KS 66047.

<sup>§</sup>Department of Molecular Biosciences and Center for Bioinformatics, University of Kansas, 2030 Becker Dr., Lawrence, KS 66047.

<sup>¶</sup>IMCA-CAT, Hauptman Woodward Medical Research Institute, 9700 S. Cass Avenue, Bldg. 435A, Argonne, IL 60439.

\*To whom correspondence should be addressed: Email: [mrivera@ku.edu](mailto:mrivera@ku.edu)

**Sequence of primer pairs used to introduce the site directed mutations in the *bfrB* gene:**

- D34F: Forward: 5'GCATAGCCGCATGTGGAATTTTTGGGGCCTGAAACGTCTGG3'  
Reverse: 5'CCAGACGTTTCAGGCCCAAAAATTCCACATGCGGCTATGC3'
- N148L: Forward: 5'CAGAAAGTGGGCCTGGAAGTGTATCTGCAGAGCCATATGC3'  
Reverse: 5' GCATATGGCTCTGCAGATACAGTTCCAGGCCCACTTTCTG 3'
- Q151L: Forward: 5' GCCTGGAAAAGTATCTGCTGAGCCATATGCATGAAG 3'  
Reverse: 5' CTTCATGCATATGGCTCAGCAGATAGTTTTCCAGGC 3'
- C89S: Forward: 5' CACCCAGGAAATGCTGCAGAGCGATCTGAATCTGGAAC 3'  
Reverse: 5' GTTCCAGATTCAGATCGCTCTGCAGCATTTCCTGGGTG 3'
- K96C: Forward: 5' GCGATCTGAATCTGGAAGTGTGCGCGACCAAAGATCTGCGTG 3'  
Reverse: 5' CACGCAGATCTTTGGTCGCGCACAGTTCCAGATTCAGATCGC 3'

**Figure S1.** Phased anomalous difference maps (blue mesh) contoured at  $3\sigma$  for various iron atom sites. **(A)** Fe-soaked BfrB C89S/K96C showing  $\text{Fe}_{4f-1}$  and the nearby  $\text{Fe}_{4f-2}$  atom. **(B)** The 4-fold pore for Fe-soaked BfrB N148L  $\text{Fe}_{4f-3}$  located at the entrance of the 4-fold pore from the interior cavity. The potassium ion in the pore is drawn as a purple sphere. **(C)**  $\text{Fe}_{4f-1}$  in Fe-soaked Q151L BfrB and **(D)** Fe-soaked D34F BfrB.

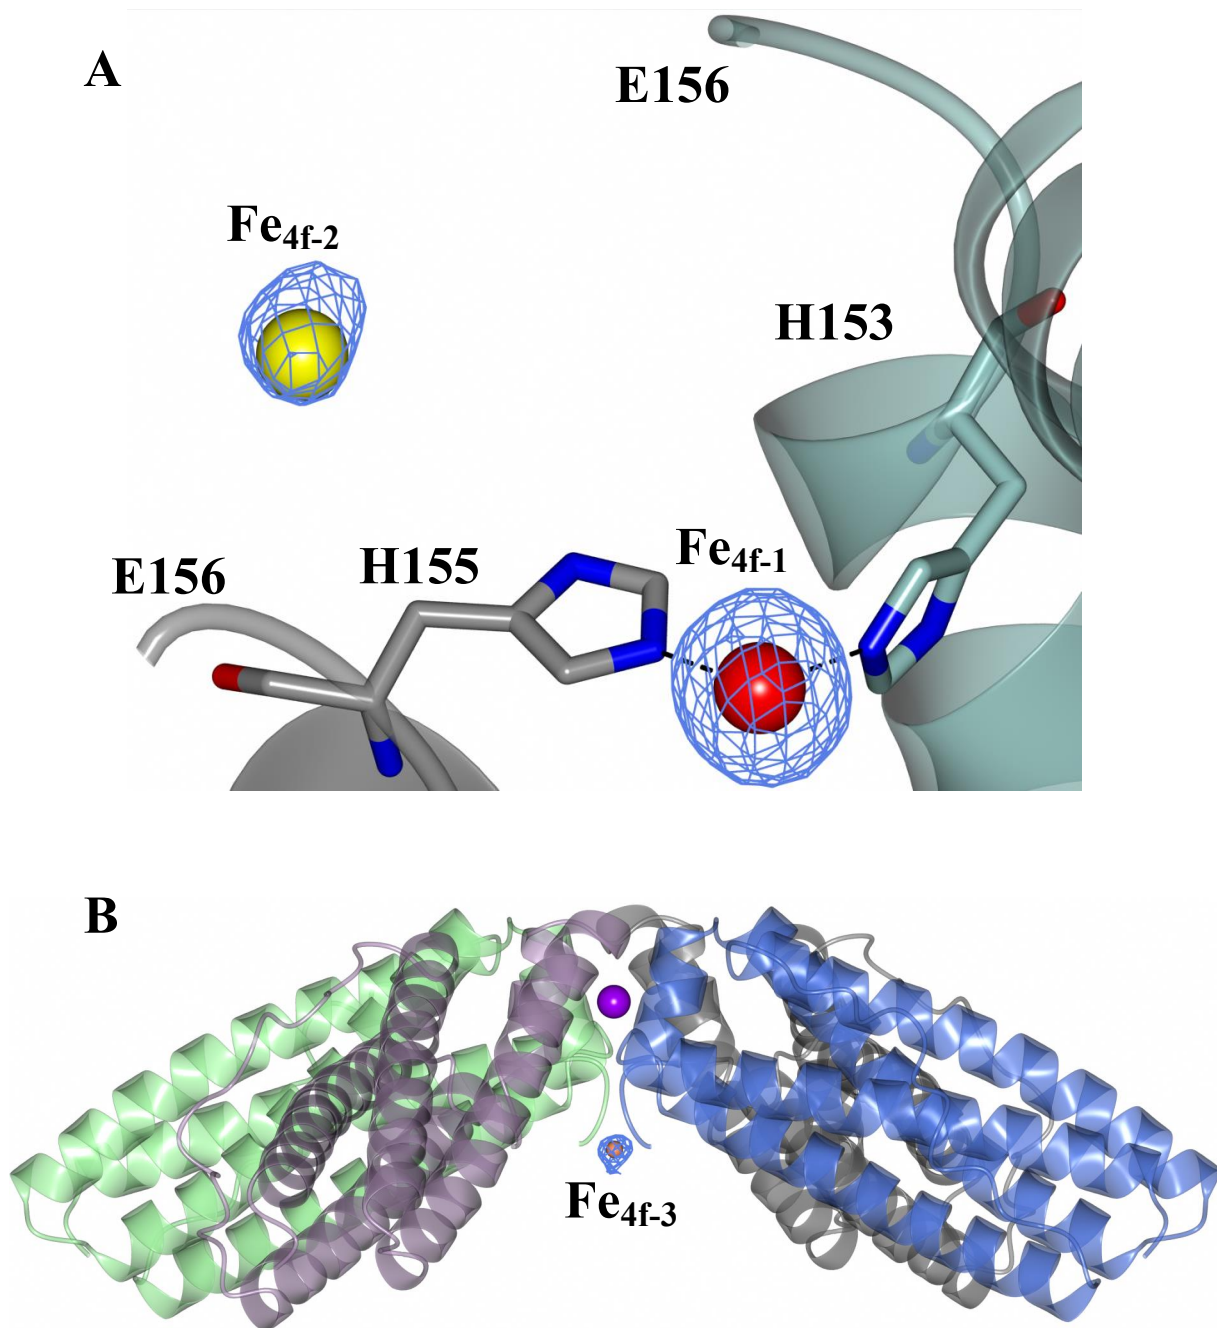

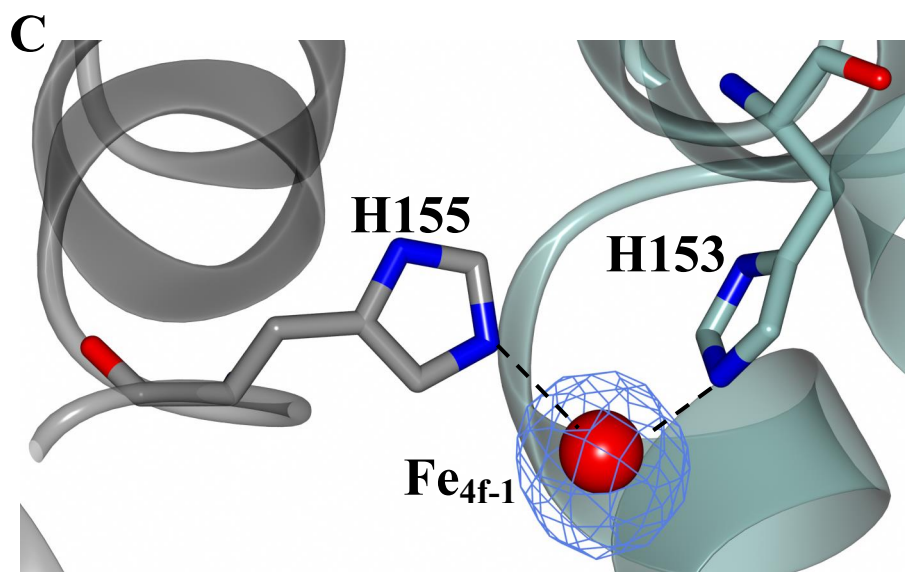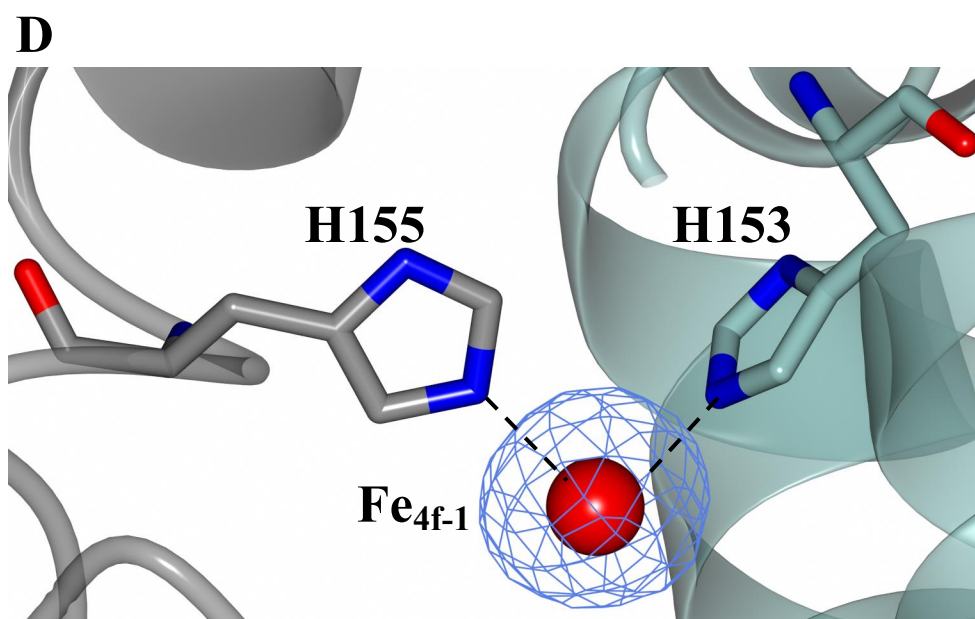

**Figure S2.** Phased anomalous difference maps contoured at  $3\sigma$  for the potassium ion in the 4-fold pore of Fe-soaked BfrB C89S/K96C. Maps were computed using data collected at wavelengths of 1.7398 Å (blue mesh) and 1.7463 Å (orange). The peak height increases from 5.5  $\sigma$  to 9.4  $\sigma$  using data collected at 1.7398 Å and 1.7463 Å, respectively, supporting the assignment of a potassium ion. The anomalous difference density disappears at the iron sites for the longer wavelength data.

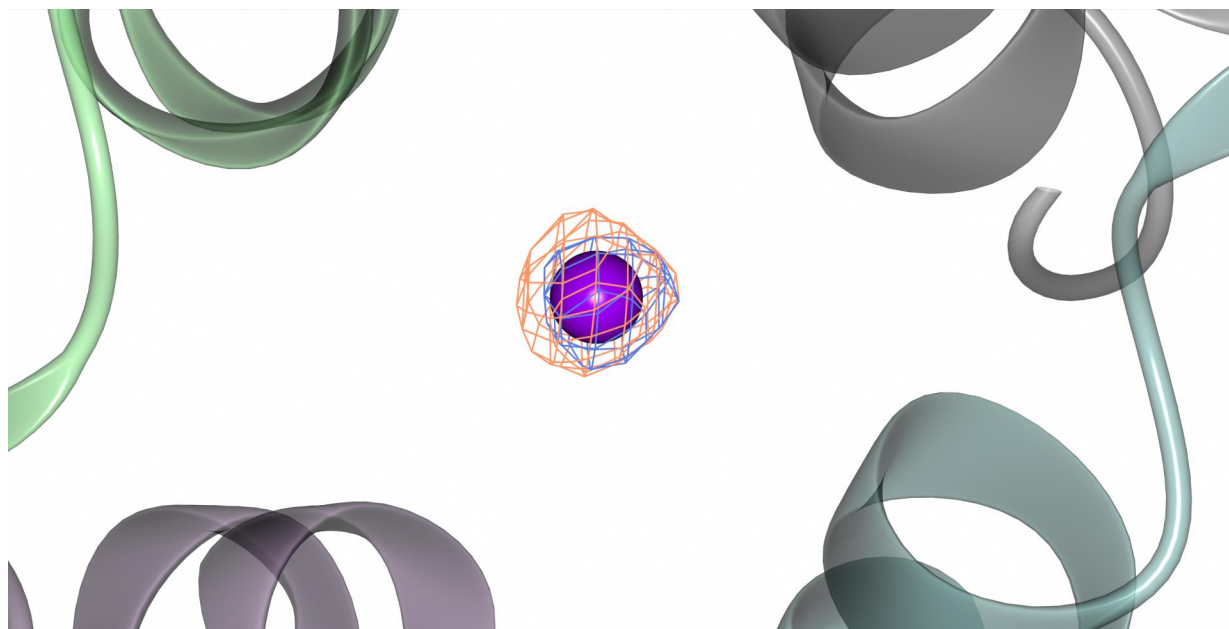

**Figure S3.** Phased anomalous difference maps contoured at  $3\sigma$  (blue mesh) for the iron atoms ( $\text{Fe}_{3f}$ ) and 2Fo-Fc maps (green mesh) contoured at  $1\sigma$  for the sulfate ions in the 3-fold pores of (A) Fe-soaked C89S/K96C BfrB, (B) Fe-soaked N148L BfrB, (C) Fe-soaked Q151L BfrB and (D) Fe-soaked D34F BfrB.

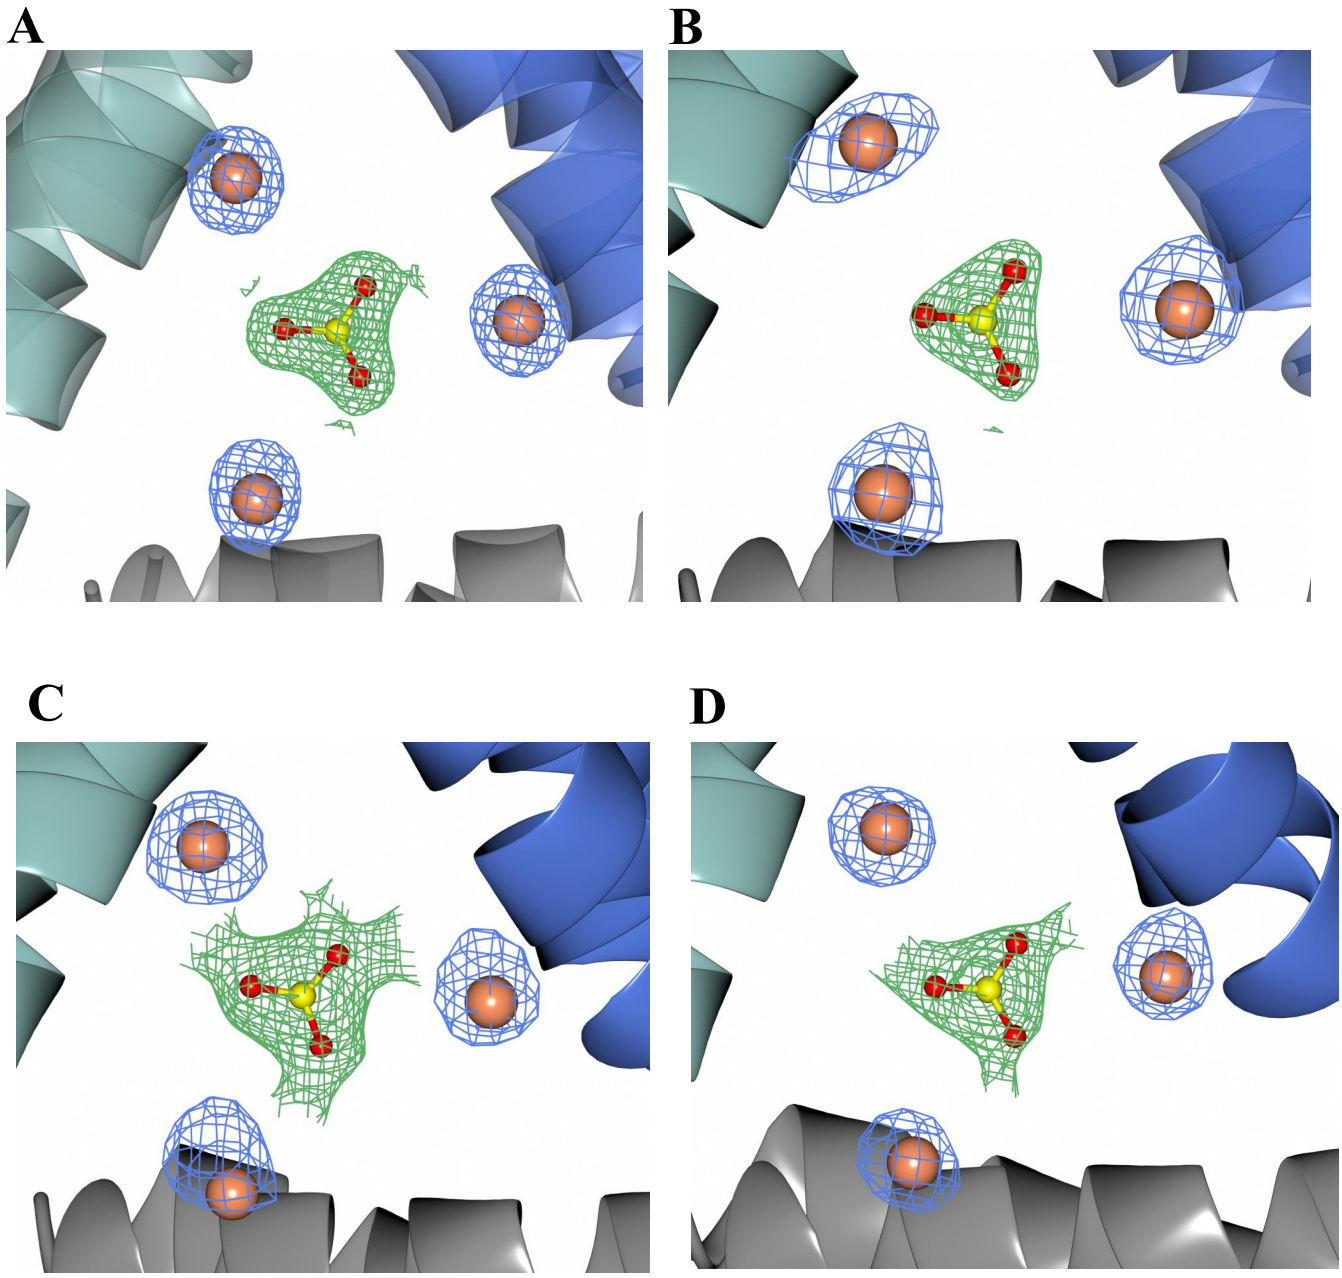

**Figure S4.** 2Fo-Fc maps (blue mesh) contoured at  $1\sigma$  for the sulfate ions in the 3-fold pores of as-isolated-2 BfrB C89S/K96C. **(A)** Viewed along the 3-fold pore. **(B)** Viewed approximately perpendicular to the 3-fold pore.

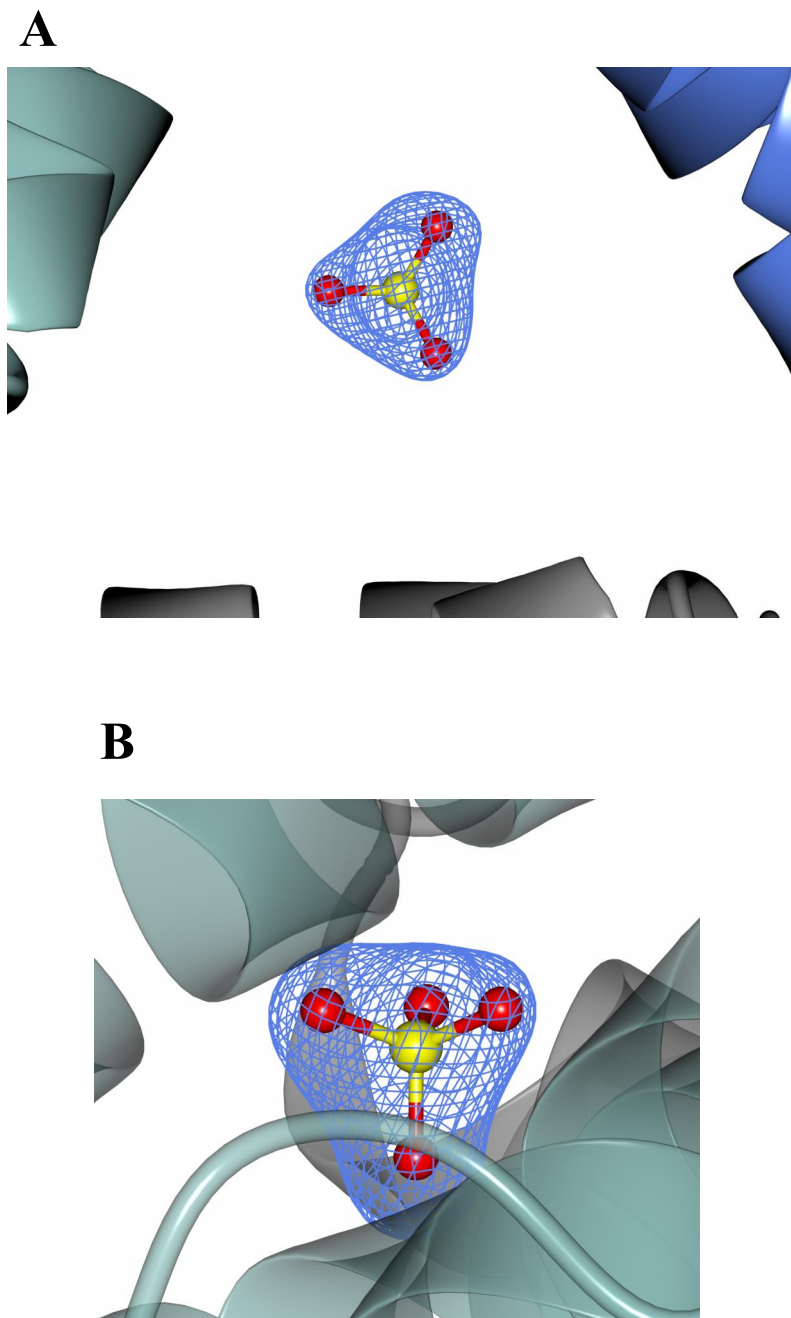

**Figure S5.** Phased anomalous difference maps contoured at  $3\sigma$  (blue mesh) for the iron atoms in the B-pores of (A) Fe-soaked D34F BfrB and (B) Fe-soaked C89S/K96C BfrB.

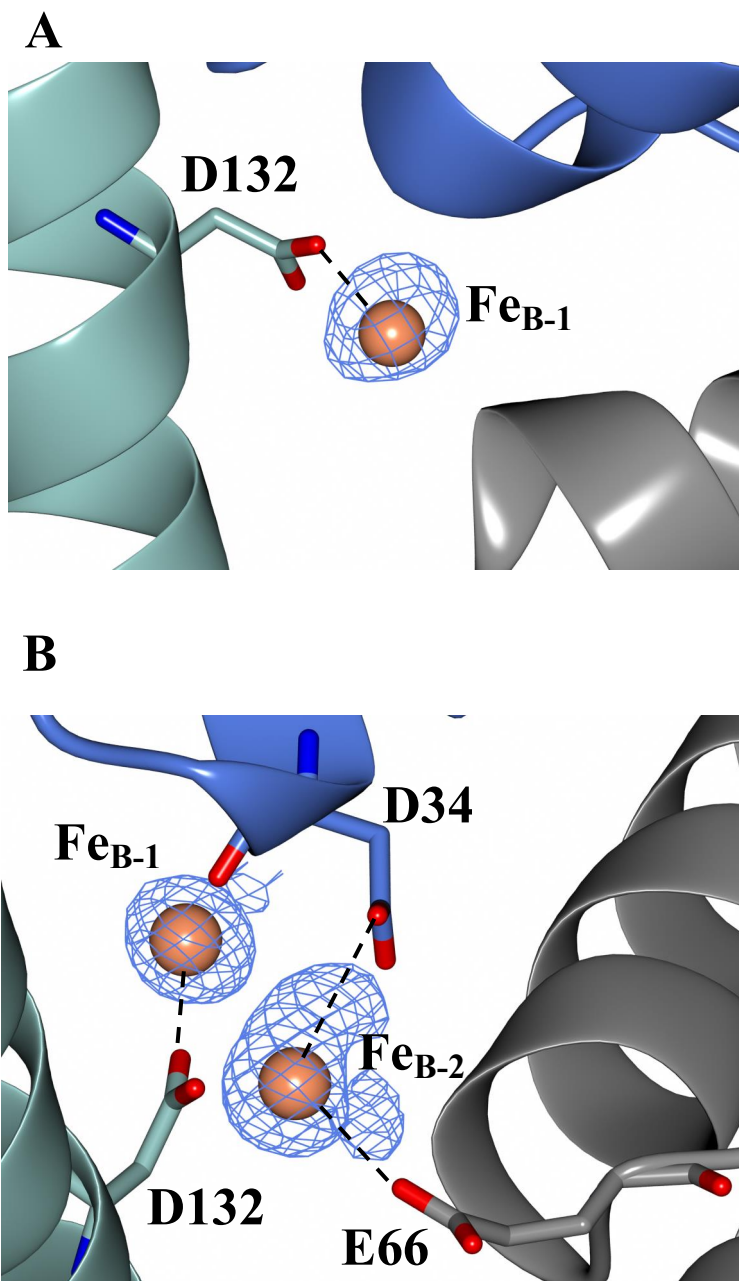



**Figure S6.** Phased anomalous difference maps contoured at  $3\sigma$  (blue mesh) for the iron atoms in the ferroxidase center of (A) Fe-soaked C89S/K96C BfrB, (B) Fe-soaked N148L BfrB, (C) Fe-soaked Q151L BfrB and (D) Fe-soaked D34F BfrB.

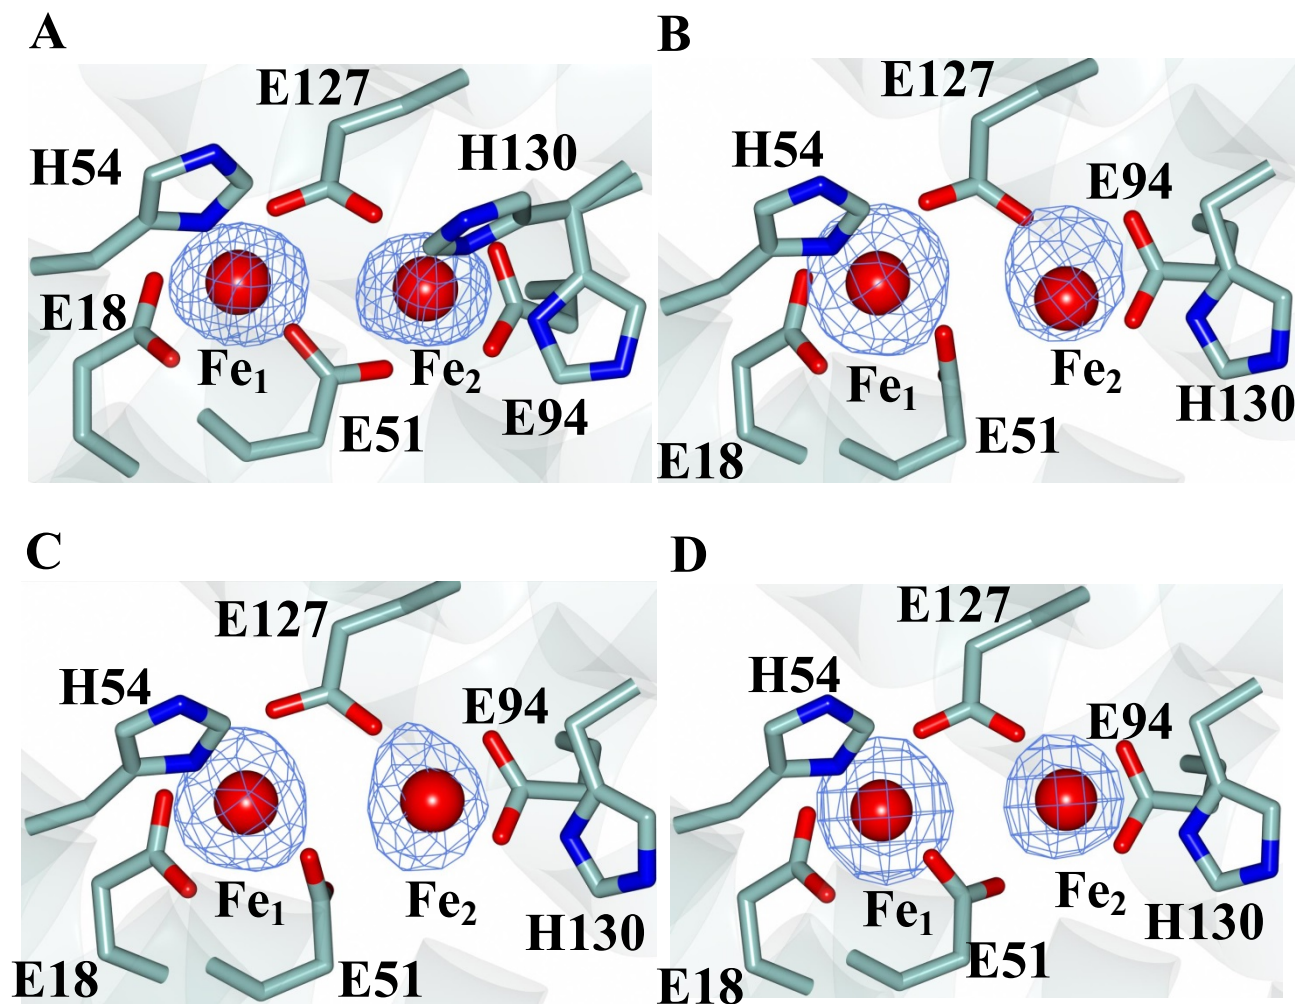

**Figure S7.** Phased anomalous difference maps contoured at  $3\sigma$  (blue mesh) for the iron atom located below the ferroxidase center ( $\text{Fe}_{\text{b-fc}}$ ) in Fe-soaked BfrB C89S/K96C. Subunit A of this structure is depicted for which alternate conformations were observed for H46 and H130. Residue E50 is near ( $\sim 4.5 \text{ \AA}$ )  $\text{Fe}_{\text{b-fc}}$  but is not coordinated.

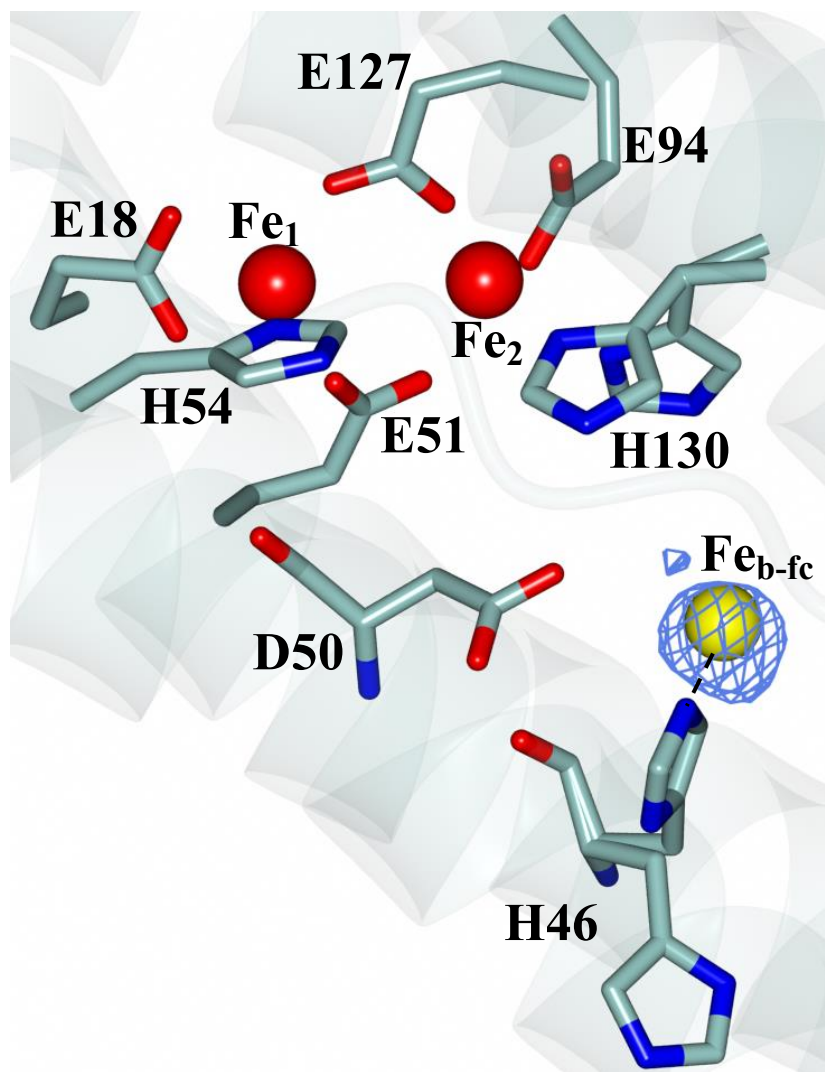

**Figure S8.** Zoomed-in view of the region near C96 (subunit A) in the as-isolated C89S/K96C BfrB structures. Residue Cys 96 in the asymmetric unit is colored magenta and its counterpart related by the symmetry operator (Y, X, -Z) is colored gray. **A)** In as-isolated BfrB C89S/K96C, Cys 96 adopts two conformations with a distance of 4.7 Å between sulfur atoms. **B)** In the as-isolated-2 BfrB C89S/K96C structure, the Cys 96 residues are brought closer together and form an intermolecular disulfide bond.

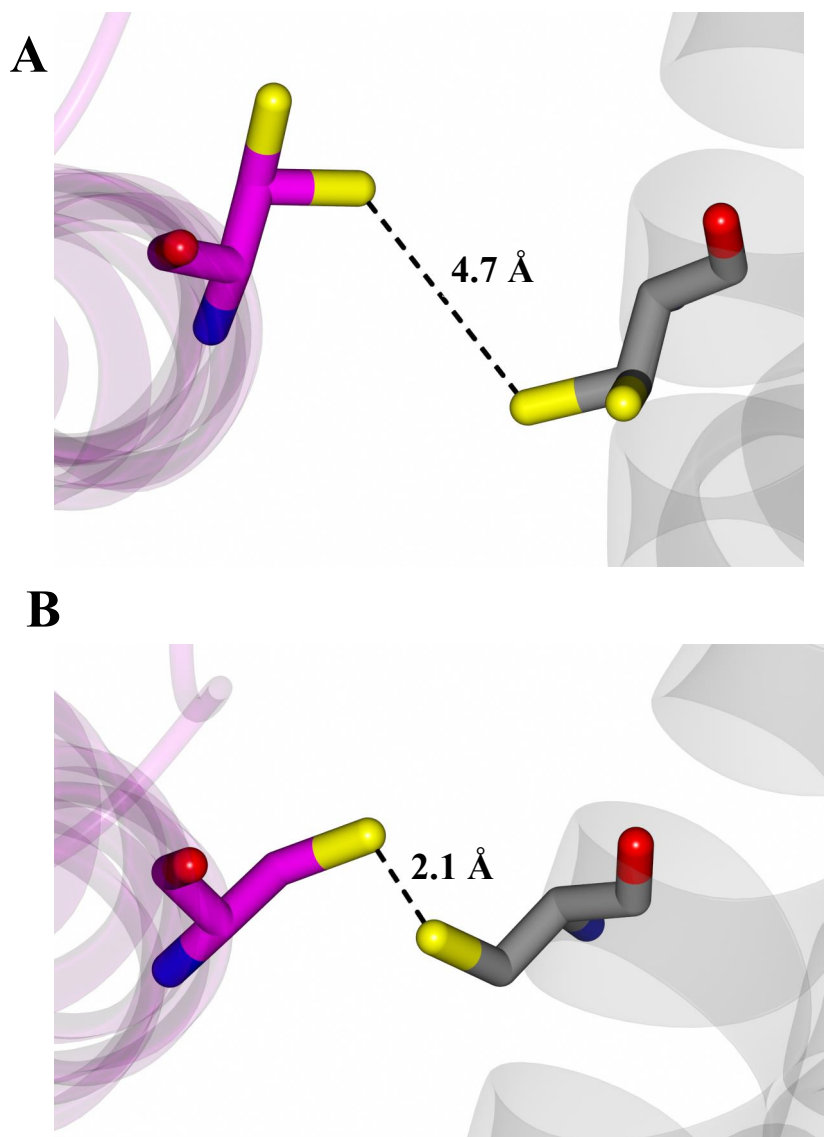

**Table S1.** Anomalous peak heights and *B*-factors for the Fe atoms in the iron soaked C89S/K96C BfrB structure.

| Fe # | Location           | Anomalous Peak Height ( $\sigma$ ) | <i>B</i> -factor ( $\text{\AA}^2$ ) |
|------|--------------------|------------------------------------|-------------------------------------|
| 13   | Fe <sub>4f-1</sub> | 51.9                               | 18.8                                |
| 6    | Fe <sub>1</sub>    | 43.3                               | 22.3                                |
| 10   | Fe <sub>2</sub>    | 50.1                               | 22.3                                |
| 12   | Fe <sub>2</sub>    | 35.9                               | 22.7                                |
| 15   | Fe <sub>4f-1</sub> | 46.7                               | 22.9                                |
| 14   | Fe <sub>4f-1</sub> | 47.8                               | 23.0                                |
| 5    | Fe <sub>1</sub>    | 43.1                               | 23.0                                |
| 7    | Fe <sub>1</sub>    | 39.9                               | 23.2                                |
| 16   | Fe <sub>4f-1</sub> | 46.2                               | 24.0                                |
| 8    | Fe <sub>1</sub>    | 40.0                               | 24.3                                |
| 11   | Fe <sub>2</sub>    | 42.7                               | 24.5                                |
| 2    | Fe <sub>out</sub>  | 39.8                               | 28.1                                |
| 1    | Fe <sub>out</sub>  | 37.1                               | 29.5                                |
| 9    | Fe <sub>2</sub>    | 32.9                               | 29.9                                |
| 4    | Fe <sub>out</sub>  | 38.4                               | 30.7                                |
| 3    | Fe <sub>out</sub>  | 35.0                               | 30.8                                |
| 18   | Fe <sub>3f</sub>   | 28.2                               | 37.0                                |
| 19   | Fe <sub>3f</sub>   | 22.8                               | 39.4                                |
| 20   | Fe <sub>3f</sub>   | 26.7                               | 39.5                                |
| 17   | Fe <sub>3f</sub>   | 25.7                               | 40.3                                |
| 21   | Fe <sub>B-2</sub>  | 24.6                               | 45.3                                |
| 24   | Fe <sub>B-2</sub>  | 22.0                               | 50.3                                |
| 28   | Fe <sub>B-1</sub>  | 18.0                               | 51.8                                |
| 22   | Fe <sub>B-2</sub>  | 21.4                               | 52.1                                |
| 23   | Fe <sub>B-2</sub>  | 20.8                               | 52.4                                |
| 27   | Fe <sub>B-1</sub>  | 17.4                               | 53.7                                |
| 30   | Fe <sub>b-fc</sub> | 16.3                               | 56.4                                |
| 31   | Fe <sub>b-fc</sub> | 13.6                               | 62.2                                |
| 26   | Fe <sub>B-1</sub>  | 13.3                               | 62.2                                |
| 25   | Fe <sub>B-1</sub>  | 16.4                               | 63.0                                |
| 32   | Fe <sub>b-fc</sub> | 12.4                               | 65.4                                |
| 29   | Fe <sub>b-fc</sub> | 9.5                                | 80.4                                |
| 36   | Fe <sub>4f-2</sub> | 8.1                                | 81.4                                |
| 34   | Fe <sub>4f-2</sub> | 7.3                                | 96.4                                |
| 33   | Fe <sub>4f-2</sub> | 8.9                                | 96.8                                |
| 37   | Fe <sub>4f-2</sub> | 8.1                                | 104.5                               |

- Anomalous peak heights for the heme Fe atoms were 33.1  $\sigma$ , 28.3  $\sigma$  and 23.9  $\sigma$ .
- Fe<sub>out</sub> are on the exterior surface, and are equivalent to Fe<sub>out</sub> reported previously (ref. 21); PDB ID: 3IS8.

**Table S2.** Anomalous peak height and *B*-factors ranges for the Fe atoms in the iron soaked BfrB N148L, Q151L and D34F mutant structures. The anomalous peak heights are listed from low to high and *B*-factor ranges from high to low.

|                                                   | <b>N148L</b> | <b>Q151L</b> | <b>D34F</b> |
|---------------------------------------------------|--------------|--------------|-------------|
| Anomalous Peak Height Range ( $\sigma$ )          | 8.1 – 42.8   | 7.5 – 32.8   | 7.4 – 29.0  |
| <i>B</i> -factor Range ( $\text{\AA}^2$ )         | 91.0 – 21.8  | 84.8 – 32.6  | 76.1 – 21.8 |
| # of Fe atoms                                     | 126          | 120          | 144         |
| Anomalous Peak Height Range ( $\sigma$ ) for Heme | 18.2 – 21.3  | 23.6 – 27.6  | 32.0 – 42.0 |
